# Supplementary figures and images for: [Retracted] Sirtuin 1 Induces Choroidal Neovascularization and Triggers Age‐Related Macular Degeneration by Promoting LCN2 through SOX9 Deacetylation
Source: Hindawi journal article supplement (doi:10.1155/2022/1671438), 2022-01-01

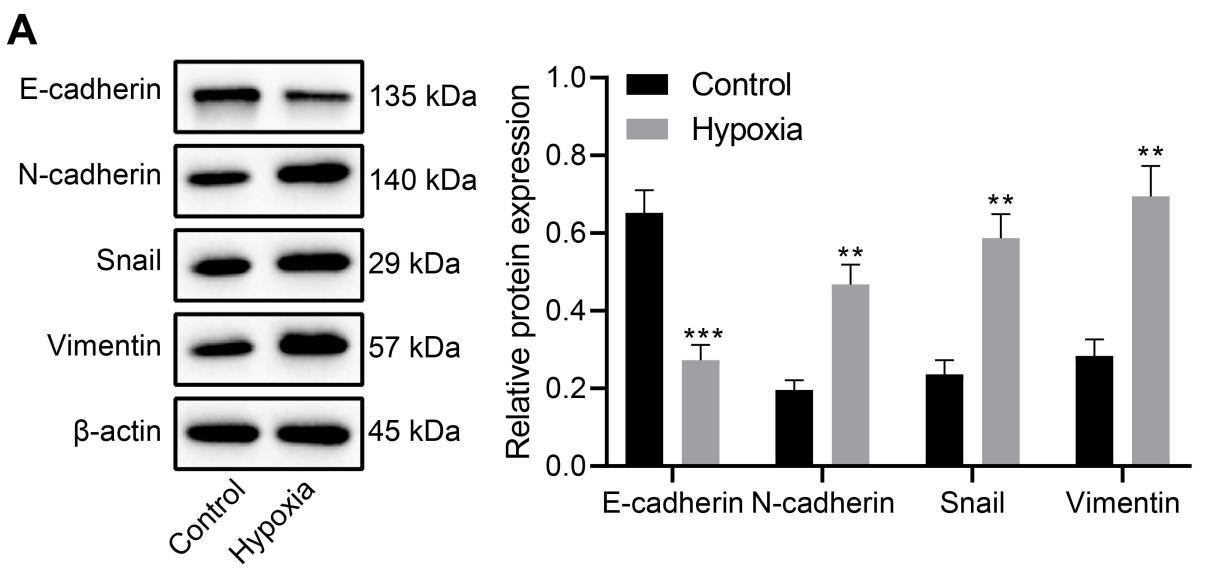

Supplement: f1 [file 1671438.f1.docx]
